# Supplementary material
Source: PubMed Central journal article supplement (PMC5375030)
Supplement: NIHMS585954-supplement-S1_-_S6.pdf [file NIHMS585954-supplement-S1_-_S6.pdf]

Table S1  
*Ethogram*

| Activity          | Operational Definition                                                                                                                                                                                                                                  |
|-------------------|---------------------------------------------------------------------------------------------------------------------------------------------------------------------------------------------------------------------------------------------------------|
| Phee Calling      | High pitched vocalizations lasting 1-3 seconds. Often composed of bouts of 2-5 distinct vocalizations or “syllables”. Each bout was scored as one call; a new bout was scored if the behavior had not been performed in the previous 5-second interval. |
| Alarm Calling     | Short, sharp, guttural chuck vocalizations, often grouped into bouts. Each bout was scored as one call; a new bout was scored if the behavior had not been performed in the previous 5-second interval.                                                 |
| Cage Manipulation | Pulling or biting at the cage wire, bungee cords, or cage fasteners.                                                                                                                                                                                    |
| Locomotion        | Whole body movement from one of the six planes (four walls, floor, or ceiling) of the transport cage.                                                                                                                                                   |

Table S2  
*Correlations among behavioral and cortisol measures*

|                  |                   | Reactivity | 24-h Post | AUCi |
|------------------|-------------------|------------|-----------|------|
| 6 Months (N=47)  | Phee Calling      | -.11       | .22       | .11  |
|                  | Alarm Calling     | .32*       | .08       | .26  |
|                  | Cage Manipulation | .00        | -.18      | .02  |
|                  | Locomotion        | -.08       | .18       | .09  |
| 12 Months (N=41) | Phee Calling      | .08        | .07       | .14  |
|                  | Alarm Calling     | .11        | .18       | .21  |
|                  | Cage Manipulation | -.08       | .15       | .06  |
|                  | Locomotion        | .23        | .28       | .24  |
| 18 Months (N=30) | Phee Calling      | -.02       | -.13      | -.09 |
|                  | Alarm Calling     | -.07       | -.01      | -.03 |
|                  | Cage Manipulation | -.14       | .40*      | .23  |
|                  | Locomotion        | -.19       | .49**     | .25  |

*Note.* For AUC<sub>i</sub>, N=44, 40, and 29, for each age, respectively.

\* Indicates  $P < .05$

\*\* Indicates  $P < .01$

Table S3

*ANCOVA model for  $AUC_i$  including sex, behaviors, and interactions at 6 months*

|                   | <i>b</i> | <i>SE</i> | <i>t</i> | <i>F</i> | <i>R</i> <sup>2</sup> |
|-------------------|----------|-----------|----------|----------|-----------------------|
| Model             |          |           |          | 2.88*    | .43                   |
| Intercept         | 809.86   | 78.05     | 10.38    |          |                       |
| Sex               | -46.11   | 143.40    | -.32     |          |                       |
| Locomotion        | -3.13    | 1.29      | -2.43    |          |                       |
| Alarm Call        | 17.55    | 5.05      | 3.48     |          |                       |
| Phee Call         | -2.90    | 3.29      | -.88     |          |                       |
| Cage Manip.       | 5.75     | 5.99      | .96      |          |                       |
| Sex x Locomotion  | 6.67     | 2.15      | 3.10**   |          |                       |
| Sex x Alarm Call  | -21.67   | 7.93      | -2.73**  |          |                       |
| Sex x Phee Call   | 3.18     | 3.60      | .88      |          |                       |
| Sex x Cage Manip. | 5.09     | 15.90     | .32      |          |                       |

*Note.*  $N = 44$ .

\* $P < .05$

\*\* $P < .01$

Table S4

*ANCOVA model for post-stressor cortisol including sex, behaviors, and interactions at 6 months*

|                   | <i>b</i> | <i>SE</i> | <i>t</i> | <i>F</i> | <i>R</i> <sup>2</sup> |
|-------------------|----------|-----------|----------|----------|-----------------------|
| Model             |          |           |          | 2.91*    | .44                   |
| Intercept         | 18.98    | 3.15      | 6.04     |          |                       |
| Sex               | -4.84    | 5.78      | -.84     |          |                       |
| Locomotion        | -.12     | .05       | -2.27    |          |                       |
| Alarm Call        | .51      | .20       | 2.51     |          |                       |
| Phee Call         | -.07     | .13       | -.54     |          |                       |
| Cage Manip.       | .30      | .24       | 1.26     |          |                       |
| Sex x Locomotion  | .30      | .09       | 3.51***  |          |                       |
| Sex x Alarm Call  | -.94     | .32       | -2.94**  |          |                       |
| Sex x Phee Call   | .11      | .15       | .77      |          |                       |
| Sex x Cage Manip. | -.33     | .64       | -.52     |          |                       |

*Note.* *N* = 47.

\**P* < .05

\*\**P* < .01

\*\*\**P* < .001

Table S5  
*Regression model for AUCi by sex at 6 months*

|                       |                    | <i>b</i> | <i>SE</i> | $\beta$ | <i>t</i> | <i>F</i> | $R^2$ |
|-----------------------|--------------------|----------|-----------|---------|----------|----------|-------|
| Females <i>N</i> = 18 | Model              |          |           |         |          | 3.75*    | .54   |
|                       | Intercept          | 352.83   | 128.95    |         | 2.74     |          |       |
|                       | Cage Manipulations | 10.84    | 11.60     | .21     | .93      |          |       |
|                       | Alarm Calling      | -4.13    | 4.82      | -.18    | -.86     |          |       |
|                       | Phee Calling       | .28      | 1.15      | .06     | .24      |          |       |
|                       | Locomotion         | 3.54     | 1.36      | .60     | 2.61*    |          |       |
| Males <i>N</i> = 26   | Model              |          |           |         |          | 3.13*    | .37   |
|                       | Intercept          | 996.27   | 139.97    |         | 7.12     |          |       |
|                       | Cage Manip.        | 5.75     | 6.65      | .18     | .86      |          |       |
|                       | Alarm Calling      | 17.55    | 5.61      | .64     | 3.13**   |          |       |
|                       | Phee Calling       | -2.90    | 3.65      | -.14    | -.79     |          |       |
|                       | Locomotion         | -3.13    | 1.43      | -.50    | -2.18*   |          |       |

\**P* < .05

\*\**P* < .01

Table S6  
*Regression model for hour post-stressor cortisol by sex at 6 months*

|                       |                    | <i>b</i> | <i>SE</i> | $\beta$ | <i>t</i> | <i>F</i> | <i>R</i> <sup>2</sup> |
|-----------------------|--------------------|----------|-----------|---------|----------|----------|-----------------------|
| Females <i>N</i> = 18 | Model              |          |           |         |          | 4.65*    | .55                   |
|                       | Intercept          | -3.44    | 5.94      |         | -.58     |          |                       |
|                       | Cage Manipulations | -.14     | .58       | -.05    | -.24     |          |                       |
|                       | Alarm Calling      | -.38     | .24       | -.29    | -1.58    |          |                       |
|                       | Phee Calling       | .05      | .06       | .16     | .79      |          |                       |
|                       | Locomotion         | .20      | .07       | .63     | 3.00*    |          |                       |
| Males <i>N</i> = 27   | Model              |          |           |         |          | 1.36     | .26                   |
|                       | Intercept          | 24.35    | 5.53      |         | 4.41     |          |                       |
|                       | Cage Manipulations | -.20     | .15       | -.26    | -1.34    |          |                       |
|                       | Alarm Calling      | .37      | .21       | .36     | 1.72     |          |                       |
|                       | Phee Calling       | -.10     | .14       | -.13    | -.68     |          |                       |
|                       | Locomotion         | -.07     | .05       | -.24    | -1.12    |          |                       |

\**P* < .05

\*\**P* < .01

\*\*\**P* < .001
